# Supplementary material
Source: PubMed Central journal article supplement (PMC5289882)
Supplement: NIHMS822224-supplement-1.pdf [file NIHMS822224-supplement-1.pdf]

|   | ALONE | BAROUSE | COFFEE | CONTENTE | DAY | ENERGETI | INACTIVE | MISERABI | RESTLESS | SAD | TENSE | URGE |
|---|-------|---------|--------|----------|-----|----------|----------|----------|----------|-----|-------|------|
| 1 | 3     | 1       | 2      | 17       | 2   | 1        | 1        | 1        | 1        | 1   | 1     | 1    |
| 2 | 2     | 1       | 3      | 17       | 2   | 1        | 2        | 1        | 1        | 2   | 0     | 0    |
| 1 | 2     | 1       | 2      | 17       | 1   | 1        | 3        | 1        | 1        | 1   | 1     | 1    |
| 1 | 3     | 1       | 3      | 17       | 3   | 1        | 1        | 1        | 1        | 1   | 0     | 0    |
| 1 | 3     | 1       | 3      | 17       | 4   | 1        | 1        | 1        | 1        | 1   | 1     | 1    |
| 1 | 3     | 1       | 4      | 17       | 4   | 1        | 1        | 1        | 1        | 1   | 0     | 0    |
| 2 | 4     | 2       | 4      | 17       | 1   | 2        | 1        | 1        | 1        | 1   | 1     | 1    |
| 1 | 4     | 1       | 3      | 17       | 3   | 1        | 1        | 1        | 1        | 1   | 0     | 0    |
| 1 | 2     | 1       | 3      | 17       | 4   | 1        | 1        | 1        | 1        | 1   | 1     | 1    |
| 1 | 3     | 1       | 3      | 17       | 3   | 1        | 1        | 1        | 1        | 1   | 1     | 1    |
| 1 | 3     | 1       | 3      | 17       | 3   | 1        | 1        | 1        | 1        | 1   | 1     | 1    |
| 2 | 2     | 1       | 4      | 17       | 4   | 2        | 1        | 1        | 4        | 1   | 0     | 0    |
| 2 | 3     | 1       | 4      | 17       | 3   | 2        | 1        | 1        | 4        | 1   | 0     | 0    |
| 1 | 3     | 2       | 3      | 17       | 3   | 2        | 2        | 4        | 1        | 3   | 0     | 0    |
| 2 | 3     | 1       | 1      | 17       | 2   | 1        | 1        | 3        | 1        | 1   | 0     | 0    |
| 1 | 2     | 1       | 1      | 17       | 1   | 1        | 1        | 2        | 1        | 2   | 0     | 0    |
| 1 | 3     | 1       | 2      | 18       | 3   | 1        | 3        | 3        | 1        | 1   | 0     | 0    |
| 1 | 3     | 2       | 3      | 18       | 4   | 1        | 1        | 1        | 1        | 3   | 0     | 0    |
| 1 | 3     | 1       | 3      | 18       | 4   | 1        | 1        | 4        | 1        | 1   | 0     | 0    |
| 1 | 3     | 1       | 4      | 18       | 4   | 1        | 1        | 1        | 1        | 1   | 1     | 1    |
| 1 | 3     | 1       | 2      | 18       | 4   | 2        | 1        | 4        | 1        | 1   | 1     | 1    |
| 1 | 3     | 1       | 4      | 18       | 4   | 1        | 1        | 4        | 1        | 1   | 1     | 1    |
| 2 | 2     | 1       | 1      | 18       | 3   | 2        | 3        | 1        | 1        | 3   | 1     | 1    |
| 1 | 2     | 1       | 3      | 18       | 3   | 1        | 1        | 1        | 1        | 1   | 0     | 0    |
| 2 | 2     | 1       | 4      | 18       | 4   | 2        | 1        | 1        | 1        | 1   | 1     | 1    |
| 1 | 2     | 1       | 3      | 18       | 4   | 2        | 1        | 1        | 3        | 1   | 1     | 1    |
| 1 | 3     | 1       | 3      | 18       | 3   | 2        | 2        | 2        | 3        | 1   | 0     | 0    |
| 1 | 3     | 1       | 3      | 18       | 3   | 2        | 1        | 1        | 1        | 1   | 0     | 0    |
| 1 | 3     | 2       | 4      | 19       | 4   | 2        | 1        | 1        | 1        | 1   | 1     | 1    |
| 2 | 3     | 2       | 3      | 19       | 4   | 1        | 1        | 1        | 1        | 1   | 1     | 1    |
| 2 | 4     | 2       | 3      | 19       | 3   | 2        | 1        | 1        | 1        | 1   | 0     | 0    |
| 2 | 3     | 1       | 3      | 19       | 3   | 1        | 1        | 1        | 1        | 1   | 0     | 0    |
| 2 | 4     | 1       | 3      | 19       | 3   | 2        | 1        | 3        | 3        | 1   | 0     | 0    |
| 2 | 3     | 1       | 3      | 19       | 4   | 1        | 1        | 4        | 3        | 1   | 0     | 0    |
| 2 | 3     | 2       | 1      | 19       | 3   | 2        | 1        | 1        | 3        | 3   | 1     | 1    |
| 2 | 3     | 1       | 3      | 19       | 3   | 1        | 1        | 1        | 1        | 1   | 0     | 0    |
| 1 | 3     | 1       | 3      | 19       | 3   | 2        | 3        | 3        | 3        | 3   | 0     | 0    |
| 2 | 3     | 1       | 1      | 19       | 3   | 2        | 2        | 3        | 1        | 1   | 0     | 0    |
| 2 | 4     | 2       | 3      | 20       | 3   | 2        | 1        | 1        | 1        | 1   | 0     | 0    |
| 2 | 4     | 2       | 4      | 20       | 3   | 1        | 1        | 1        | 2        | 1   | 0     | 0    |
| 1 | 4     | 1       | 4      | 20       | 4   | 2        | 1        | 1        | 1        | 1   | 0     | 0    |
| 1 | 3     | 1       | 3      | 20       | 3   | 2        | 1        | 1        | 4        | 1   | 0     | 0    |
| 1 | 3     | 1       | 4      | 20       | 4   | 1        | 1        | 1        | 1        | 1   | 1     | 1    |
| 1 | 4     | 1       | 3      | 20       | 4   | 1        | 1        | 1        | 1        | 1   | 1     | 1    |
| 1 | 4     | 1       | 4      | 20       | 3   | 1        | 1        | 1        | 1        | 1   | 0     | 0    |
| 1 | 4     | 2       | 2      | 20       | 4   | 1        | 1        | 1        | 1        | 1   | 1     | 1    |

|    | DAY | DOW | RESTLESS | TENSE | URGE |
|----|-----|-----|----------|-------|------|
| 17 | 3   | 1   | 1        | 1     | 1    |
| 17 | 3   | 1   | 2        | 0     | 0    |
| 17 | 3   | 1   | 1        | 1     | 1    |
| 17 | 3   | 1   | 1        | 0     | 0    |
| 17 | 3   | 1   | 1        | 1     | 1    |
| 17 | 3   | 1   | 1        | 0     | 0    |
| 17 | 3   | 1   | 1        | 1     | 1    |
| 17 | 3   | 1   | 1        | 0     | 0    |
| 17 | 3   | 1   | 1        | 1     | 1    |
| 17 | 3   | 1   | 1        | 1     | 1    |
| 17 | 3   | 1   | 1        | 0     | 0    |
| 17 | 3   | 1   | 1        | 0     | 0    |
| 17 | 3   | 1   | 1        | 0     | 0    |
| 17 | 3   | 4   | 3        | 0     | 0    |
| 17 | 3   | 3   | 1        | 0     | 0    |
| 17 | 3   | 2   | 2        | 0     | 0    |
| 18 | 4   | 3   | 1        | 0     | 0    |
| 18 | 4   | 1   | 3        | 0     | 0    |
| 18 | 4   | 4   | 1        | 0     | 0    |
| 18 | 4   | 1   | 1        | 1     | 1    |
| 18 | 4   | 4   | 1        | 1     | 1    |
| 18 | 4   | 4   | 1        | 1     | 1    |
| 18 | 4   | 1   | 3        | 1     | 1    |
| 18 | 4   | 1   | 1        | 0     | 0    |
| 18 | 4   | 1   | 1        | 1     | 1    |
| 18 | 4   | 1   | 1        | 1     | 1    |
| 18 | 4   | 2   | 1        | 0     | 0    |
| 18 | 4   | 1   | 1        | 0     | 0    |
| 19 | 5   | 1   | 1        | 1     | 1    |
| 19 | 5   | 1   | 1        | 1     | 1    |
| 19 | 5   | 1   | 1        | 0     | 0    |
| 19 | 5   | 3   | 1        | 0     | 0    |
| 19 | 5   | 4   | 1        | 0     | 0    |
| 19 | 5   | 1   | 3        | 1     | 1    |
| 19 | 5   | 1   | 1        | 0     | 0    |
| 19 | 5   | 3   | 3        | 0     | 0    |
| 19 | 5   | 3   | 1        | 0     | 0    |
| 20 | 6   | 1   | 1        | 0     | 0    |
| 20 | 6   | 1   | 1        | 0     | 0    |
| 20 | 6   | 1   | 1        | 0     | 0    |
| 20 | 6   | 1   | 1        | 1     | 1    |
| 20 | 6   | 1   | 1        | 1     | 1    |
| 20 | 6   | 1   | 1        | 0     | 0    |
| 20 | 6   | 1   | 1        | 1     | 1    |

|   | ALONE | BAROUSE | COFFEE | CONTENTE | DAY | ENERGETI | INACTIVE | MISERABI | RESTLESS | SAD | TENSE | URGE |
|---|-------|---------|--------|----------|-----|----------|----------|----------|----------|-----|-------|------|
| 1 | 3     | 1       | 3      | 20       | 4   | 1        | 1        | 4        | 1        | 1   | 0     |      |
| 1 | 4     | 1       | 3      | 20       | 3   | 1        | 1        | 1        | 1        | 1   | 0     |      |
| 1 | 4     | 1       | 2      | 20       | 2   | 1        | 2        | 3        | 4        | 3   | 0     |      |
| 1 | 4     | 1       | 2      | 20       | 1   | 1        | 4        | 4        | 1        | 4   | 0     |      |
| 2 | 3     | 2       | 3      | 21       | 4   | 1        | 1        | 1        | 3        | 1   | 0     |      |
| 2 | 4     | 1       | 4      | 21       | 4   | 1        | 1        | 1        | 1        | 1   | 0     |      |
| 2 | 4     | 1       | 3      | 21       | 3   | 1        | 1        | 1        | 1        | 1   | 0     |      |
| 2 | 3     | 1       | 3      | 21       | 3   | 2        | 3        | 1        | 1        | 3   | 0     |      |
| 2 | 4     | 1       | 4      | 21       | 4   | 1        | 1        | 1        | 1        | 4   | 0     |      |
| 2 | 2     | 2       | 1      | 21       | 3   | 1        | 3        | 3        | 4        | 1   | 0     |      |
| 2 | 2     | 1       | 2      | 21       | 4   | 2        | 1        | 1        | 4        | 1   | 1     |      |
| 1 | 4     | 1       | 4      | 22       | 4   | 2        | 1        | 1        | 4        | 1   | 0     |      |
| 1 | 2     | 1       | 4      | 22       | 4   | 1        | 1        | 1        | 3        | 1   | 1     |      |
| 1 | 4     | 1       | 4      | 22       | 3   | 1        | 3        | 1        | 4        | 1   | 0     |      |
| 1 | 2     | 1       | 2      | 22       | 4   | 1        | 1        | 3        | 4        | 1   | 0     |      |
| 1 | 2     | 1       | 2      | 22       | 4   | 1        | 3        | 3        | 4        | 1   | 1     |      |
| 1 | 2     | 1       | 3      | 22       | 3   | 1        | 1        | 1        | 1        | 1   | 0     |      |
| 1 | 3     | 1       | 4      | 22       | 4   | 1        | 1        | 1        | 3        | 1   | 0     |      |
| 1 | 3     | 1       | 3      | 22       | 3   | 1        | 1        | 1        | 1        | 1   | 0     |      |
| 1 | 3     | 2       | 3      | 22       | 3   | 2        | 1        | 1        | 1        | 1   | 0     |      |
| 2 | 3     | 1       | 4      | 22       | 4   | 1        | 1        | 1        | 1        | 1   | 0     |      |
| 1 | 3     | 1       | 1      | 22       | 1   | 1        | 4        | 4        | 3        | 4   | 1     |      |
| 2 | 2     | 1       | 3      | 23       | 3   | 1        | 3        | 3        | 3        | 3   | 0     |      |
| 1 | 3     | 1       | 3      | 23       | 1   | 1        | 2        | 1        | 3        | 1   | 0     |      |
| 1 | 3     | 1       | 3      | 23       | 3   | 1        | 1        | 1        | 3        | 1   | 0     |      |
| 1 | 4     | 1       | 4      | 23       | 4   | 1        | 1        | 1        | 1        | 1   | 0     |      |
| 1 | 3     | 1       | 3      | 23       | 4   | 1        | 1        | 3        | 3        | 1   | 0     |      |
| 1 | 2     | 1       | 4      | 23       | 3   | 1        | 1        | 1        | 1        | 3   | 0     |      |
| 1 | 3     | 1       | 2      | 23       | 3   | 1        | 1        | 3        | 3        | 2   | 0     |      |
| 2 | 3     | 2       | 3      | 23       | 3   | 1        | 1        | 1        | 1        | 1   | 1     |      |
| 2 | 4     | 1       | 3      | 23       | 3   | 1        | 1        | 1        | 3        | 1   | 1     |      |
| 1 | 4     | 1       | 3      | 23       | 4   | 2        | 1        | 3        | 3        | 1   | 0     |      |
| 1 | 4     | 1       | 3      | 23       | 3   | 2        | 1        | 1        | 1        | 2   | 0     |      |
| 1 | 3     | 1       | 3      | 23       | 3   | 2        | 1        | 1        | 1        | 1   | 0     |      |
| 1 | 4     | 1       | 1      | 24       | 4   | 1        | 1        | 1        | 4        | 1   | 0     |      |
| 1 | 3     | 1       | 2      | 24       | 3   | 1        | 1        | 3        | 3        | 2   | 0     |      |
| 1 | 3     | 1       | 2      | 24       | 4   | 1        | 3        | 3        | 3        | 2   | 0     |      |
| 1 | 3     | 2       | 2      | 24       | 4   | 1        | 3        | 1        | 4        | 1   | 0     |      |
| 1 | 2     | 1       | 2      | 24       | 2   | 1        | 3        | 1        | 3        | 1   | 1     |      |
| 1 | 3     | 1       | 2      | 24       | 3   | 1        | 3        | 1        | 3        | 1   | 0     |      |
| 2 | 4     | 1       | 3      | 24       | 3   | 2        | 4        | 3        | 3        | 1   | 1     |      |
| 2 | 2     | 1       | 2      | 24       | 2   | 1        | 1        | 4        | 3        | 2   | 0     |      |
| 1 | 1     | 1       | 2      | 24       | 1   | 1        | 1        | 1        | 3        | 1   | 0     |      |
| 2 | 3     | 1       | 3      | 24       | 3   | 2        | 1        | 2        | 1        | 1   | 0     |      |
| 1 | 2     | 1       | 1      | 24       | 3   | 2        | 1        | 1        | 1        | 1   | 0     |      |
| 1 | 3     | 1       | 4      | 24       | 1   | 1        | 1        | 1        | 3        | 3   | 0     |      |

|    | DAY | DOW | RESTLESS | TENSE | URGE |
|----|-----|-----|----------|-------|------|
| 20 | 6   | 4   | 1        | 0     |      |
| 20 | 6   | 1   | 1        | 0     |      |
| 20 | 6   | 3   | 3        | 0     |      |
| 20 | 6   | 4   | 4        | 0     |      |
| 21 | 7   | 1   | 1        | 0     |      |
| 21 | 7   | 1   | 1        | 0     |      |
| 21 | 7   | 1   | 1        | 0     |      |
| 21 | 7   | 1   | 3        | 0     |      |
| 21 | 7   | 1   | 4        | 0     |      |
| 21 | 7   | 3   | 1        | 0     |      |
| 21 | 7   | 1   | 1        | 1     |      |
| 22 | 1   | 1   | 1        | 0     |      |
| 22 | 1   | 1   | 1        | 1     |      |
| 22 | 1   | 1   | 1        | 0     |      |
| 22 | 1   | 3   | 1        | 0     |      |
| 22 | 1   | 3   | 1        | 1     |      |
| 22 | 1   | 1   | 1        | 0     |      |
| 22 | 1   | 1   | 1        | 0     |      |
| 22 | 1   | 1   | 1        | 0     |      |
| 22 | 1   | 1   | 1        | 0     |      |
| 22 | 1   | 1   | 1        | 0     |      |
| 22 | 1   | 4   | 4        | 1     |      |
| 23 | 2   | 3   | 3        | 0     |      |
| 23 | 2   | 1   | 1        | 0     |      |
| 23 | 2   | 1   | 1        | 0     |      |
| 23 | 2   | 1   | 1        | 0     |      |
| 23 | 2   | 3   | 1        | 0     |      |
| 23 | 2   | 1   | 3        | 0     |      |
| 23 | 2   | 3   | 2        | 0     |      |
| 23 | 2   | 1   | 1        | 1     |      |
| 23 | 2   | 1   | 1        | 1     |      |
| 23 | 2   | 3   | 1        | 0     |      |
| 23 | 2   | 1   | 2        | 0     |      |
| 23 | 2   | 1   | 1        | 0     |      |
| 24 | 3   | 1   | 1        | 0     |      |
| 24 | 3   | 3   | 2        | 0     |      |
| 24 | 3   | 3   | 2        | 0     |      |
| 24 | 3   | 1   | 1        | 0     |      |
| 24 | 3   | 1   | 1        | 1     |      |
| 24 | 3   | 3   | 1        | 1     |      |
| 24 | 3   | 4   | 2        | 0     |      |
| 24 | 3   | 1   | 1        | 0     |      |
| 24 | 3   | 1   | 1        | 0     |      |
| 24 | 3   | 1   | 1        | 0     |      |
| 24 | 3   | 1   | 3        | 0     |      |

|   | ALONE | BAROUSE | COFFEE | CONTENTE | DAY | ENERGETI | INACTIVE | MISERABI | RESTLESS | SAD | TENSE | URGE |    | DAY | DOW | RESTLESS | TENSE | URGE |
|---|-------|---------|--------|----------|-----|----------|----------|----------|----------|-----|-------|------|----|-----|-----|----------|-------|------|
| 2 | 2     | 1       | 3      | 24       | 2   | 1        | 1        | 1        | 4        | 1   | 0     | 0    | 24 | 3   | 1   | 1        | 0     | 0    |
| 2 | 4     | 2       | 3      | 25       | 4   | 2        | 1        | 1        | 1        | 1   | 0     | 0    | 25 | 4   | 1   | 1        | 0     | 0    |
| 1 | 4     | 1       | 4      | 25       | 4   | 1        | 1        | 1        | 1        | 1   | 0     | 0    | 25 | 4   | 1   | 1        | 0     | 0    |
| 1 | 4     | 2       | 4      | 25       | 4   | 1        | 1        | 1        | 1        | 1   | 0     | 0    | 25 | 4   | 1   | 1        | 0     | 0    |
| 1 | 4     | 1       | 1      | 25       | 4   | 1        | 1        | 1        | 1        | 1   | 0     | 0    | 25 | 4   | 1   | 1        | 0     | 0    |
| 1 | 4     | 2       | 3      | 25       | 4   | 1        | 1        | 1        | 1        | 1   | 0     | 0    | 25 | 4   | 1   | 1        | 0     | 0    |
| 1 | 4     | 1       | 3      | 25       | 3   | 1        | 1        | 1        | 1        | 1   | 0     | 0    | 25 | 4   | 1   | 1        | 0     | 0    |
| 1 | 4     | 1       | 3      | 25       | 4   | 1        | 1        | 1        | 1        | 1   | 0     | 0    | 25 | 4   | 1   | 1        | 0     | 0    |
| 1 | 4     | 1       | 3      | 25       | 3   | 1        | 2        | 1        | 1        | 1   | 0     | 0    | 25 | 4   | 1   | 1        | 0     | 0    |
| 1 | 3     | 1       | 4      | 25       | 4   | 2        | 1        | 1        | 1        | 1   | 0     | 0    | 25 | 4   | 1   | 1        | 0     | 0    |
| 1 | 3     | 1       | 4      | 25       | 2   | 1        | 1        | 1        | 3        | 1   | 0     | 0    | 25 | 4   | 1   | 1        | 0     | 0    |
| 1 | 4     | 1       | 3      | 25       | 3   | 1        | 1        | 1        | 1        | 1   | 0     | 0    | 25 | 4   | 1   | 1        | 0     | 0    |
| 1 | 2     | 1       | 1      | 25       | 1   | 1        | 3        | 1        | 2        | 3   | 1     | 0    | 25 | 4   | 1   | 3        | 1     | 0    |
| 1 | 3     | 1       | 3      | 26       | 3   | 2        | 1        | 1        | 1        | 1   | 0     | 0    | 26 | 5   | 1   | 1        | 0     | 0    |
| 1 | 3     | 1       | 3      | 26       | 3   | 1        | 1        | 1        | 1        | 1   | 0     | 0    | 26 | 5   | 1   | 1        | 0     | 0    |
| 1 | 4     | 1       | 3      | 26       | 3   | 1        | 1        | 3        | 1        | 1   | 0     | 0    | 26 | 5   | 3   | 1        | 0     | 0    |
| 1 | 3     | 1       | 3      | 26       | 3   | 1        | 1        | 1        | 1        | 1   | 0     | 0    | 26 | 5   | 1   | 1        | 0     | 0    |
| 1 | 4     | 1       | 4      | 26       | 4   | 1        | 1        | 1        | 1        | 1   | 0     | 0    | 26 | 5   | 1   | 1        | 0     | 0    |
| 2 | 2     | 1       | 3      | 26       | 2   | 1        | 2        | 1        | 1        | 1   | 0     | 0    | 26 | 5   | 1   | 1        | 0     | 0    |
| 1 | 4     | 1       | 4      | 26       | 3   | 1        | 1        | 1        | 1        | 1   | 0     | 0    | 26 | 5   | 1   | 1        | 0     | 0    |
| 1 | 3     | 1       | 4      | 26       | 3   | 1        | 1        | 1        | 1        | 1   | 0     | 0    | 26 | 5   | 1   | 1        | 0     | 0    |
| 2 | 4     | 2       | 4      | 27       | 4   | 2        | 1        | 1        | 1        | 1   | 0     | 0    | 27 | 6   | 1   | 1        | 0     | 0    |
| 1 | 4     | 1       | 3      | 27       | 4   | 1        | 1        | 1        | 1        | 1   | 0     | 0    | 27 | 6   | 1   | 1        | 0     | 0    |
| 2 | 4     | 1       | 2      | 27       | 3   | 2        | 1        | 4        | 3        | 1   | 1     | 0    | 27 | 6   | 4   | 1        | 1     | 0    |
| 2 | 4     | 1       | 1      | 27       | 4   | 2        | 1        | 1        | 3        | 1   | 0     | 0    | 27 | 6   | 1   | 1        | 0     | 0    |
| 2 | 4     | 1       | 3      | 27       | 3   | 1        | 1        | 1        | 1        | 1   | 0     | 0    | 27 | 6   | 1   | 1        | 0     | 0    |
| 1 | 4     | 1       | 3      | 27       | 3   | 1        | 1        | 1        | 1        | 1   | 0     | 0    | 27 | 6   | 1   | 1        | 0     | 0    |
| 1 | 3     | 1       | 2      | 27       | 2   | 1        | 1        | 1        | 3        | 3   | 0     | 0    | 27 | 6   | 1   | 3        | 0     | 0    |
| 1 | 3     | 1       | 3      | 27       | 3   | 2        | 1        | 1        | 3        | 1   | 0     | 0    | 27 | 6   | 1   | 1        | 0     | 0    |
| 2 | 4     | 1       | 3      | 27       | 3   | 2        | 1        | 1        | 1        | 1   | 0     | 0    | 27 | 6   | 1   | 1        | 0     | 0    |
| 2 | 4     | 2       | 2      | 28       | 4   | 2        | 1        | 1        | 4        | 1   | 0     | 0    | 28 | 7   | 1   | 1        | 0     | 0    |
| 2 | 4     | 1       | 2      | 28       | 4   | 1        | 1        | 1        | 4        | 1   | 0     | 0    | 28 | 7   | 1   | 1        | 0     | 0    |
| 2 | 3     | 1       | 1      | 28       | 3   | 1        | 1        | 3        | 3        | 4   | 0     | 0    | 28 | 7   | 3   | 4        | 0     | 0    |
| 2 | 4     | 1       | 2      | 28       | 4   | 1        | 2        | 1        | 4        | 3   | 0     | 0    | 28 | 7   | 1   | 3        | 0     | 0    |
| 2 | 3     | 1       | 1      | 28       | 3   | 1        | 2        | 4        | 4        | 1   | 0     | 0    | 28 | 7   | 4   | 1        | 0     | 0    |
| 2 | 4     | 1       | 2      | 28       | 1   | 1        | 1        | 1        | 4        | 1   | 0     | 0    | 28 | 7   | 1   | 1        | 0     | 0    |
| 1 | 4     | 1       | 3      | 28       | 3   | 1        | 1        | 1        | 3        | 1   | 0     | 0    | 28 | 7   | 1   | 1        | 0     | 0    |
| 1 | 4     | 2       | 4      | 29       | 4   | 2        | 1        | 1        | 1        | 1   | 0     | 0    | 29 | 1   | 1   | 1        | 0     | 0    |
| 2 | 4     | 1       | 4      | 29       | 3   | 2        | 1        | 1        | 2        | 1   | 0     | 0    | 29 | 1   | 1   | 1        | 0     | 0    |
| 1 | 3     | 1       | 4      | 29       | 4   | 1        | 1        | 1        | 1        | 1   | 0     | 0    | 29 | 1   | 1   | 1        | 0     | 0    |
| 1 | 5     | 1       | 3      | 29       | 4   | 1        | 1        | 2        | 1        | 1   | 0     | 0    | 29 | 1   | 2   | 1        | 0     | 0    |
| 1 | 2     | 1       | 3      | 29       | 3   | 1        | 1        | 1        | 1        | 1   | 0     | 0    | 29 | 1   | 1   | 1        | 0     | 0    |
| 1 | 4     | 1       | 4      | 29       | 4   | 1        | 1        | 3        | 3        | 1   | 0     | 0    | 29 | 1   | 3   | 1        | 0     | 0    |
| 1 | 3     | 1       | 3      | 29       | 3   | 1        | 1        | 1        | 1        | 1   | 0     | 0    | 29 | 1   | 1   | 1        | 0     | 0    |
| 1 | 3     | 1       | 3      | 29       | 3   | 1        | 1        | 1        | 1        | 1   | 0     | 0    | 29 | 1   | 1   | 1        | 0     | 0    |
| 1 | 4     | 2       | 4      | 30       | 4   | 1        | 1        | 1        | 1        | 1   | 0     | 0    | 30 | 2   | 1   | 1        | 0     | 0    |



|   | ALONE | BAROUSE | COFFEE | CONTENTE | DAY | ENERGETI | INACTIVO | MISERABLI | RESTLESS | SAD | TENSE | URGE |    | DAY | DOW | RESTLESS | TENSE | URGE |
|---|-------|---------|--------|----------|-----|----------|----------|-----------|----------|-----|-------|------|----|-----|-----|----------|-------|------|
| 1 | 2     | 1       | 3      | 34       | 3   | 1        | 1        | 1         | 1        | 2   | 0     |      | 34 | 6   | 1   | 2        | 0     |      |
| 1 | 3     | 1       | 2      | 35       | 3   | 1        | 1        | 1         | 2        | 1   | 0     |      | 35 | 7   | 1   | 1        | 0     |      |
| 2 | 3     | 2       | 3      | 35       | 4   | 1        | 1        | 2         | 3        | 1   | 0     |      | 35 | 7   | 2   | 1        | 0     |      |
| 2 | 3     | 1       | 3      | 35       | 3   | 1        | 1        | 1         | 3        | 1   | 0     |      | 35 | 7   | 1   | 1        | 0     |      |
| 2 | 3     | 1       | 3      | 35       | 4   | 1        | 4        | 1         | 1        | 1   | 0     |      | 35 | 7   | 1   | 1        | 0     |      |
| 1 | 3     | 1       | 3      | 35       | 4   | 1        | 1        | 1         | 4        | 1   | 0     |      | 35 | 7   | 1   | 1        | 0     |      |
| 1 | 2     | 1       | 3      | 35       | 2   | 1        | 1        | 1         | 3        | 1   | 0     |      | 35 | 7   | 1   | 1        | 0     |      |
| 1 | 3     | 1       | 4      | 36       | 4   | 1        | 1        | 1         | 1        | 1   | 0     |      | 36 | 1   | 1   | 1        | 0     |      |
| 1 | 3     | 1       | 3      | 36       | 3   | 1        | 1        | 1         | 1        | 1   | 0     |      | 36 | 1   | 1   | 1        | 0     |      |
| 1 | 3     | 1       | 2      | 36       | 4   | 2        | 1        | 2         | 3        | 1   | 0     |      | 36 | 1   | 2   | 1        | 0     |      |
| 1 | 3     | 1       | 3      | 36       | 3   | 2        | 1        | 1         | 1        | 1   | 0     |      | 36 | 1   | 1   | 1        | 0     |      |
| 1 | 3     | 1       | 3      | 36       | 4   | 1        | 1        | 1         | 1        | 1   | 0     |      | 36 | 1   | 1   | 1        | 0     |      |
| 1 | 3     | 1       | 3      | 36       | 3   | 1        | 1        | 1         | 3        | 1   | 0     |      | 36 | 1   | 1   | 1        | 0     |      |
| 2 | 3     | 1       | 3      | 36       | 4   | 1        | 1        | 1         | 1        | 1   | 0     |      | 36 | 1   | 1   | 1        | 0     |      |
| 2 | 3     | 1       | 1      | 36       | 2   | 2        | 1        | 1         | 4        | 1   | 0     |      | 36 | 1   | 1   | 1        | 0     |      |
| 2 | 3     | 1       | 3      | 36       | 3   | 2        | 1        | 1         | 1        | 1   | 0     |      | 36 | 1   | 1   | 1        | 0     |      |
| 1 | 3     | 1       | 4      | 36       | 1   | 1        | 1        | 1         | 4        | 1   | 0     |      | 36 | 1   | 1   | 1        | 0     |      |
| 1 | 3     | 1       | 3      | 36       | 3   | 1        | 3        | 1         | 1        | 1   | 0     |      | 36 | 1   | 1   | 1        | 0     |      |
| 1 | 2     | 1       | 4      | 36       | 2   | 1        | 1        | 1         | 3        | 1   | 0     |      | 36 | 1   | 1   | 1        | 0     |      |
| 2 | 4     | 2       | 2      | 37       | 4   | 2        | 1        | 1         | 1        | 1   | 0     |      | 37 | 2   | 1   | 1        | 0     |      |
| 1 | 3     | 1       | 1      | 37       | 3   | 1        | 2        | 1         | 4        | 1   | 0     |      | 37 | 2   | 1   | 1        | 0     |      |
| 1 | 3     | 1       | 3      | 37       | 3   | 1        | 1        | 1         | 1        | 1   | 0     |      | 37 | 2   | 1   | 1        | 0     |      |
| 1 | 4     | 1       | 4      | 37       | 4   | 1        | 1        | 1         | 1        | 1   | 0     |      | 37 | 2   | 1   | 1        | 0     |      |
| 1 | 3     | 1       | 1      | 37       | 2   | 1        | 1        | 3         | 3        | 1   | 0     |      | 37 | 2   | 3   | 1        | 0     |      |
| 2 | 3     | 1       | 3      | 37       | 3   | 1        | 1        | 1         | 3        | 1   | 0     |      | 37 | 2   | 1   | 1        | 0     |      |
| 2 | 3     | 1       | 1      | 37       | 3   | 1        | 1        | 1         | 3        | 1   | 0     |      | 37 | 2   | 1   | 1        | 0     |      |
| 1 | 3     | 1       | 3      | 37       | 3   | 1        | 1        | 3         | 1        | 1   | 0     |      | 37 | 2   | 3   | 1        | 0     |      |
| 2 | 3     | 1       | 3      | 37       | 4   | 2        | 1        | 1         | 4        | 1   | 0     |      | 37 | 2   | 1   | 1        | 0     |      |
| 1 | 3     | 2       | 3      | 37       | 3   | 1        | 1        | 1         | 1        | 1   | 0     |      | 37 | 2   | 1   | 1        | 0     |      |
| 1 | 3     | 2       | 1      | 38       | 3   | 1        | 2        | 1         | 3        | 2   | 0     |      | 38 | 3   | 1   | 2        | 0     |      |
| 1 | 3     | 1       | 3      | 38       | 4   | 1        | 1        | 1         | 2        | 1   | 0     |      | 38 | 3   | 1   | 1        | 0     |      |
| 1 | 3     | 1       | 4      | 38       | 4   | 1        | 1        | 1         | 3        | 1   | 0     |      | 38 | 3   | 1   | 1        | 0     |      |
| 1 | 4     | 1       | 3      | 38       | 3   | 1        | 1        | 1         | 1        | 1   | 0     |      | 38 | 3   | 1   | 1        | 0     |      |
| 2 | 3     | 1       | 4      | 38       | 4   | 1        | 1        | 1         | 2        | 1   | 0     |      | 38 | 3   | 1   | 1        | 0     |      |
| 1 | 3     | 1       | 3      | 38       | 3   | 1        | 1        | 1         | 1        | 1   | 0     |      | 38 | 3   | 1   | 1        | 0     |      |
| 2 | 2     | 1       | 1      | 38       | 3   | 2        | 3        | 4         | 4        | 1   | 0     |      | 38 | 3   | 4   | 1        | 0     |      |
| 1 | 2     | 1       | 1      | 38       | 4   | 1        | 1        | 1         | 3        | 1   | 0     |      | 38 | 3   | 1   | 1        | 0     |      |
| 2 | 3     | 2       | 2      | 39       | 4   | 2        | 3        | 1         | 3        | 1   | 0     |      | 39 | 4   | 1   | 1        | 0     |      |
| 1 | 4     | 1       | 3      | 39       | 4   | 1        | 1        | 1         | 4        | 1   | 0     |      | 39 | 4   | 1   | 1        | 0     |      |
| 1 | 3     | 1       | 1      | 39       | 4   | 1        | 1        | 1         | 3        | 1   | 0     |      | 39 | 4   | 1   | 1        | 0     |      |
| 1 | 3     | 1       | 3      | 39       | 4   | 1        | 1        | 1         | 3        | 1   | 0     |      | 39 | 4   | 1   | 1        | 0     |      |
| 2 | 4     | 1       | 3      | 39       | 4   | 2        | 1        | 1         | 1        | 4   | 0     |      | 39 | 4   | 1   | 4        | 0     |      |
| 1 | 3     | 1       | 4      | 39       | 3   | 1        | 1        | 1         | 3        | 1   | 0     |      | 39 | 4   | 1   | 1        | 0     |      |
| 1 | 3     | 1       | 3      | 39       | 3   | 2        | 1        | 1         | 1        | 1   | 0     |      | 39 | 4   | 1   | 1        | 0     |      |
| 1 | 3     | 1       | 3      | 39       | 3   | 1        | 1        | 1         | 2        | 1   | 0     |      | 39 | 4   | 1   | 1        | 0     |      |
| 1 | 3     | 1       | 4      | 40       | 4   | 1        | 1        | 1         | 1        | 1   | 0     |      | 40 | 5   | 1   | 1        | 0     |      |
